# Supplementary material for: Skin liquid biopsy method for assessing the immune environment of cutaneous T-cell lymphoma lesions
Source: Research Square preprint supplement (doi:10.21203/rs.3.rs-410301/v1), 2021-04-23
Supplement: Supplementary file 1 [file 37c71ea741b4e269c1391630.docx]

Table 1. Patient background

| Pt | Age  (yr) | Sex | Disease | Stage | mSWAT | CD8/45RO  (%, PB) | CD8/45RO  (%, LB) | Tissue  CD8/45RO | CyTOF | RNA-seq | TCR repertoire | Treatment |
| --- | --- | --- | --- | --- | --- | --- | --- | --- | --- | --- | --- | --- |
| 1 | 83 | M | MF | IB | 44 | 10.4 | 11.2 | 45 |  |  |  | Chemo + PUVA |
| 2 | 68 | M | MF | IB | 49 | 0.18 | 0.5 | 45 |  |  |  | Chemo |
| 3 | 61 | F | MF | IIIA | 64 | 3.25 | 3.54 | 44 |  |  |  | Chemo + PUVA |
| 4 | 88 | F | MF | IB | 38 | 7.69 | 9.18 | 8*9* |  | CD8/45RO | CD8/45RO | PUVA |
| 5 | 71 | F | MF | IB | 102 | 3.12 | 4.03 | 19 | ○ |  |  | Chemo + PUVA |
| 6 | 82 | M | MF | IB | 40 | 0.65 | 0.72 | 67 | ○ |  |  | Chemo |
| 7 | 56 | F | MF | IB | 36 | 2.22 | 2.33 | 71 | ○ |  |  | Chemo + PUVA |
| 8 | 70 | M | MF | IIIA | 138 | 0.34 | 0.26 | 13 |  |  |  | Chemo + PUVA |
| 9 | 78 | F | MF | IB | 22 | 1.71 | 3.81 | 135 | ○ |  |  | Chemo + PUVA |
| 10 | 71 | M | MF | IIB | 109 | 0.76 | 0.97 | 23 | ○ |  | CD8/45RO | Chemo + PUVA |
| 11 | 64 | F | MF | IB | 70 | 2.3 | 2.4 | 82 |  |  | CD4/45RO | Chemo + PUVA |
| 12 | 72 | F | MF | IB | 39 | 12.6 | 11.8 | 167 |  | CD4/45RO |  | Chemo + PUVA |
| 13 | 78 | M | MF | IA | 15 | 13 | 15 | 178 |  |  |  | PUVA |
| 14 | 72 | M | MF | IB | 22 | 1.5 | 1.9 | 154 |  |  | CD8/45RO | Chemo + PUVA |
| 15 | 45 | F | MF | IA | 14 | 1.88 | 2.3 |  |  |  | CD8/45RO | Chemo + PUVA |
| 16 | 67 | M | MF | IIIA | 94 | 1.16 | 1.81 |  |  | CD4/45RO |  | Chemo |
| 17 | 45 | M | MF | IB | 26 | 1.71 | 1.7 |  |  | CD4/45RO |  | Chemo + PUVA |
| 18 | 70 | M | MF | IB | 35 | 3.42 | 3.44 |  |  | CD8/45RO |  | Chemo + PUVA |
| 19 | 34 | F | MF | IB | 40 | 1.26 | 1.45 |  |  | CD8/45RO |  | Chemo + PUVA |

All MF patients are CD4+ MF and underwent skin biopsies on admission treatment. MF: Mycosis Fungoides, Chemo: Chemotherapy (bexarotene), PUVA: Psoralen and Ultraviolet A.
